# Supplementary material for: ArcaNN: automated enhanced sampling generation of training sets for chemically reactive machine learning interatomic potentials
Source: Royal Society of Chemistry journal article supplement (doi:10.1039/d4dd00209a), 2024-10-30
Supplement: d4dd00209a1.pdf [file d4dd00209a1.pdf]

## Supplementary Information

# ArcaNN: automated enhanced sampling generation of training sets for chemically reactive machine learning interatomic potentials

Rolf David,\* Miguel de la Puente, Axel Gomez, Olaia Anton, Guillaume  
Stirnemann,\* and Damien Laage\*

*PASTEUR, Département de Chimie, École Normale Supérieure, PSL University, Sorbonne  
Université, CNRS, 75005 Paris*

E-mail: rolf.david@ens.psl.eu; guillaume.stirnemann@ens.psl.eu; damien.laage@ens.psl.eu

# Contents

|                                                                                                                                     |     |
|-------------------------------------------------------------------------------------------------------------------------------------|-----|
| Details on the initial <i>ab initio</i> MD simulations for the $S_N2$ reaction                                                      | S3  |
| Timings of the ArcaNN training                                                                                                      | S4  |
| User-provided tree folder structure                                                                                                 | S5  |
| Machine JSON user file used by ArcaNN                                                                                               | S6  |
| JSON control files written by ArcaNN                                                                                                | S7  |
| Evolution of the candidate and rejected structures with exploration time per reactive exploration iteration for the $S_N2$ reaction | S11 |
| Validation of the $R5$ (production) NNP for the $S_N2$ reaction                                                                     | S12 |
| Free energy profiles and CV for the $NR2$ and $NR3$ NNPs for the $S_N2$ reaction                                                    | S14 |
| Validation of the $R8$ (production) NNP for the Diels-Alder reaction                                                                | S15 |
| Joint density distribution of the two main distances for the Diels-Alder reaction                                                   | S17 |
| Joint density distribution of the two main distances in each important training dataset for the $S_N2$ reaction                     | S18 |
| OPES 1D free energy profile and CV from the $R5$ NNP for the $S_N2$ reaction                                                        | S19 |

## Details on the initial *ab initio* MD simulations for the $S_N2$ reaction

The first step consisted on the preparation of the initial datasets by generating reactant structures, by *ab initio* MD simulations. In order to perform the MD simulations, we have to construct an initial structure of the system. A  $15 \text{ \AA}^3$  cubic box was constructed with packmol,<sup>1</sup> containing one bromide ion, one chloromethane molecule and 38 acetonitrile molecules. An energy minimization of the system was then performed using the Amber22 software. The AMBER’s built in General Forcefield (GAFF)<sup>2</sup> parameters were used for the chloromethane, the acetonitrile and the bromide ion, with the AM1-BCC charge model was used to generate atomic charges Next, the system was heated to a temperature of 300 K in the NVT ensemble for 20 ps, and then equilibrated in the NPT ensemble for 200 ps and at a pressure of 1 bar and a temperature of 300 K, both with a timestep of 2 fs. From this equilibration, 20 snapshots were extracted, with ten of them having their bromine and chlorine atoms swapped (to generate the product structures). With these initial structures, *ab initio* MD simulations were performed with the CP2K software<sup>3</sup> at the BLYP<sup>4,5</sup> level of theory and with the D3 dispersion correction.<sup>6</sup> The DZVP-MOLOPT-SR<sup>7,8</sup> basis set was used in conjunction with the GTH pseudopotentials.<sup>9-11</sup> Each run was performed within the NVT ensemble at 300 K with a timestep of 0.5 fs for 2 ps. The temperature control was enabled by the use of a CSVR thermostat<sup>12</sup> with a time constant of  $0.1 \text{ ps}^{-1}$ .

## Timings of the ArcaNN training

Table S1: Summary of Timings for the initial aiMD, the training, exploration, and labeling Phases for the  $S_N2$  reaction

| Phase        | Hardware Used           | Average Time per Cycle | Total Time          |
|--------------|-------------------------|------------------------|---------------------|
| Initial aiMD | AMD EPYC 7H12           | -                      | 26897.4 core.hours  |
| Training     | Nvidia V100 SXM2        | 14.67 gpu.hours        | 190.76 gpu.hours    |
| Exploration  | Nvidia V100 SXM2        | 59.04 gpu.hours        | 767.57 gpu.hours    |
| Labeling     | Intel Cascade Lake 6248 | 1836.79 core.hours     | 23878.21 core.hours |

Table S2: Summary of Timings for the initial aiMD, the training, exploration, and labeling Phases for the Diels-Alder reaction

| Phase        | Hardware Used           | Average Time per Cycle | Total Time         |
|--------------|-------------------------|------------------------|--------------------|
| Initial aiMD | Cascade Lake 6248       | -                      | 1928.72 core.hours |
| Training     | Nvidia A100 SXM4        | 3.58 gpu.hours         | 32.24 gpu.hours    |
| Exploration  | Nvidia V100 SXM2        | 27.81 gpu.hours        | 250.33 gpu.hours   |
| Labeling     | Intel Cascade Lake 6248 | 297.56 core.hours      | 2380.45 core.hours |

## User-provided tree folder structure

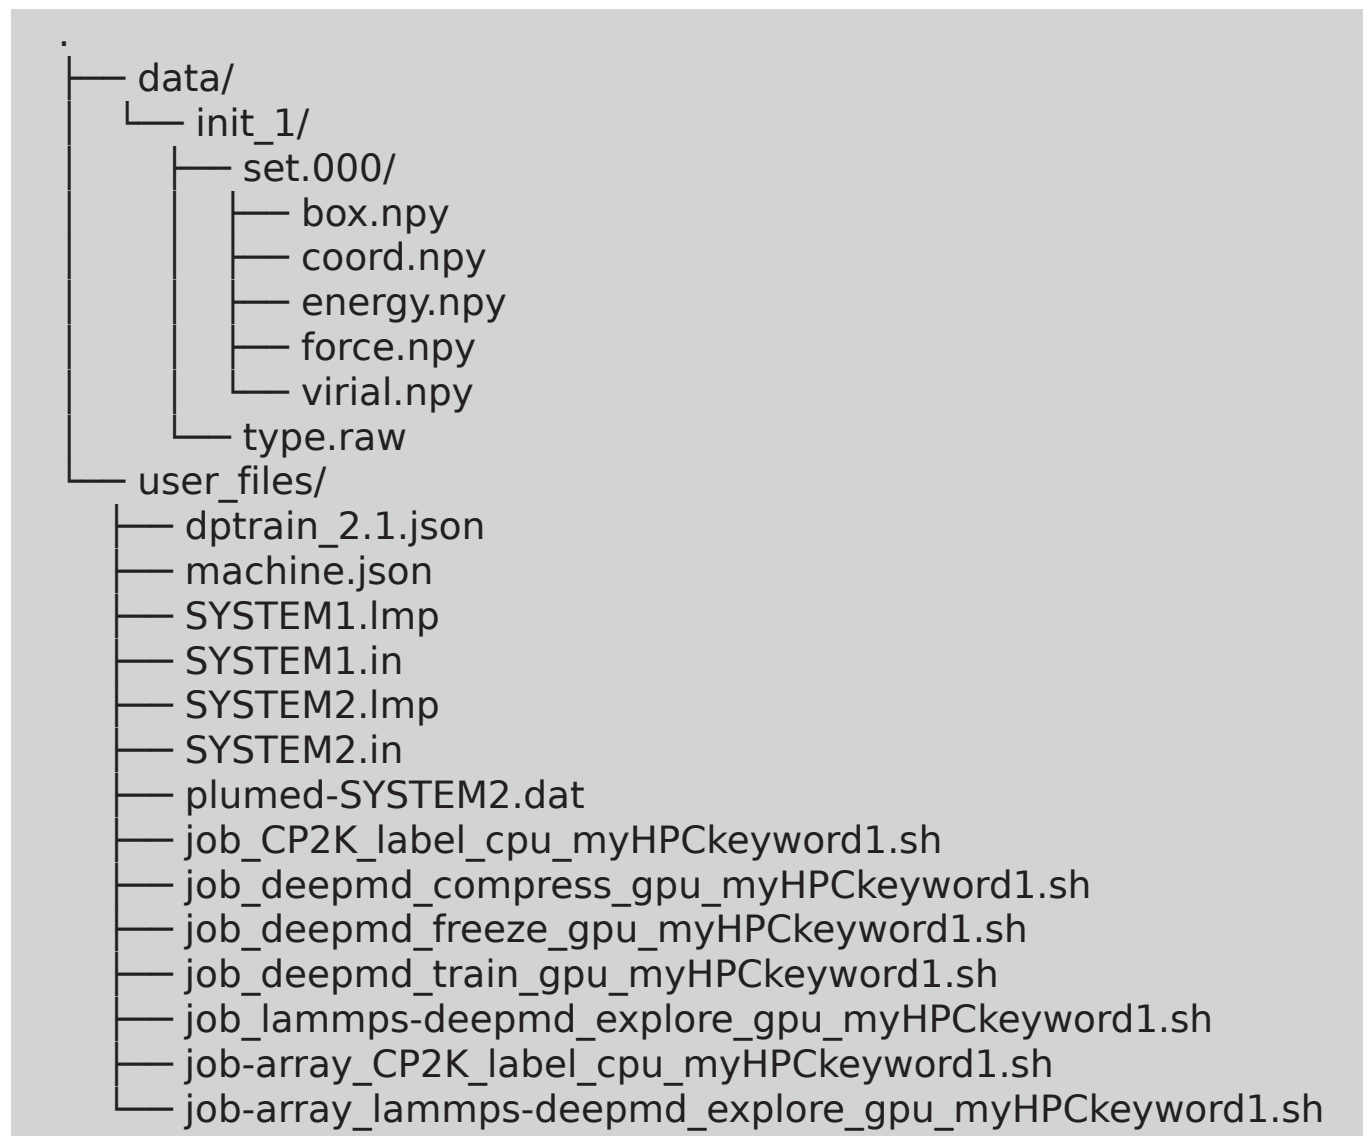

Figure S1: Example of the tree folder structure used by ArcaNN.

## Machine JSON user file used by ArcaNN

```
{
  "myHPCkeyword1":
  {
    "hostname": "myHPC1",
    "walltime_format": "hours",
    "job_scheduler": "slurm",
    "launch_command": "sbatch",
    "max_jobs" : 200,
    "max_array_size" : 500,
    "mykeyword1": {
      "project_name": "myproject",
      "allocation_name": "myallocationcpu",
      "arch_name": "cpu",
      "arch_type": "cpu",
      "partition": "mypartitioncpu",
      "subpartition": null,
      "qos": {"mypartitioncpu1": 72000, "mypartitioncpu2": 360000},
      "valid_for":
      ↪ ["labeling","freezing","compressing","exploration","test","training"],
      "default":
      ↪ ["labeling","freezing","compressing","exploration","test","training"]
    }
  }
}
```

Figure S2: Example of a *machine.json* file for configuring HPC resources in ArcaNN.

## JSON control files written by ArcaNN

```
{
  "user_machine_keyword_train": "a100",
  "use_initial_datasets": true,
  "use_extra_datasets": false,
  "job_walltime_train_h": 6.093055555555556,
  "mean_s_per_step": 0.044764725,
  "start_lr": 0.001,
  "stop_lr": 1e-06,
  "decay_rate": 0.9172759353897796,
  "decay_steps": 5000,
  "numb_steps": 400000,
  "training_datasets": ["init_1", "init_2", "SYSTEM_A_001", "SYSTEM_B_002"],
  "trained_count": 27196,
  "initial_count": 27131,
  "added_auto_count": 65,
  "extra_count": 0,
  "is_prepared": true,
  "is_launched": true,
  "is_checked": true,
}
```

Figure S3: A pruned control training JSON file.

```

{
  "user_machine_keyword_exp": "v100",
  "deepmd_model_version": 2.1,
  "nnp_count": 3,
  "systems_auto": {
    "SYSTEM_A": {
      "nb_steps": 320000,
      "print_every_x_steps": 3200,
      "nb_atm": 790,
      "exploration_type": "lammps",
      "traj_count": 2,
      "temperature_K": 298.15,
      "timestep_ps": 0.0005,
      "previous_start": true,
      "print_interval_mult": 0.01,
      "max_exp_time_ps": 400,
      "completed_count": 6,
      "mean_s_per_step": 0.0074279635416666665,
      "max_candidates": 50,
      "sigma_low": 0.2,
      "sigma_high": 0.7,
      "sigma_high_limit": 1.0,
      "ignore_first_x_ps": 0.5,
      "mean_deviation_max_f": 0.12157408506666667,
      "total_count": 600,
      "candidates_count": 13,
      "rejected_count": 0,
      "selected_count": 13,
      "discarded_count": 0
    }
  },
  "is_locked": true,
  "is_launched": true,
  "is_checked": true,
  "is_deviated": true,
  "is_extracted": true,
  "nb_sim": 156
}

```

Figure S4: A pruned control exploration JSON file.



```
{
  "labeling_program": "cp2k",
  "user_machine_keyword_label": "cpu",
  "systems_auto": {
    "SYSTEM_A": {
      "walltime_first_job_h": 0.5,
      "walltime_second_job_h": 0.5,
      "nb_nodes": 1,
      "nb_mpi_per_node": 10,
      "nb_threads_per_mpi": 1,
      "candidates_count": 5,
      "disturbed_candidates_count": 0,
      "timings_s": [382.4943999999999, 598.353],
      "candidates_skipped_count": 0,
    },
    "total_to_label": 126,
    "launch_all_jobs": true,
    "is_locked": true,
    "is_launched": true,
    "is_checked": true,
    "is_extracted": true
  }
}
```

Figure S5: A pruned control labeling JSON file.

```
{
  "user_machine_keyword_test": "v100",
  "job_email": "",
  "job_walltime_h": 2.0,
  "is_compressed": true,
  "deepmd_model_version": 2.1,
  "graph_1_002_compressed": {
    "SYSTEM_A": {
      "energy_rmse": 0.3445179,
      "energy_rmse_per_atom": 0.0004360987,
      "force_rmse": 0.0486603,
      "virial_rmse": 11.81919,
      "virial_rmse_per_atom": 0.014961,
      "number_of_test_data": 2.0,
      "trained": true
    },
  },
}
```

Figure S6: A pruned control testing JSON file.

Evolution of the candidate and rejected structures with exploration time per reactive exploration iteration for the  $S_N2$  reaction

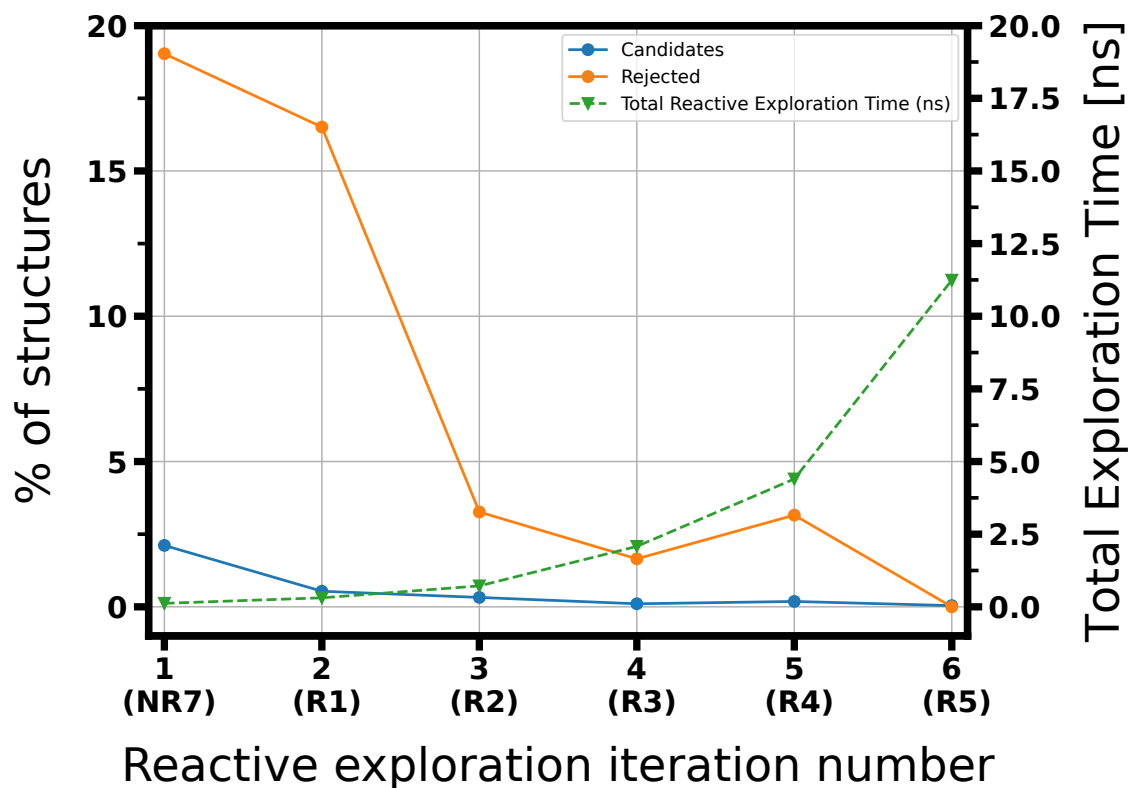

Figure S7: Percentage of candidate structures (solid blue line), rejected structures (solid orange line), and total exploration time (dashed green line) for each reactive exploration step, with the associated training dataset name in parentheses.

# Validation of the $R5$ (production) NNP for the $S_N2$ reaction

In Figure S8, we report the component-wise force RMSE and the maximum component-wise force error along  $\delta d$  on the test dataset.

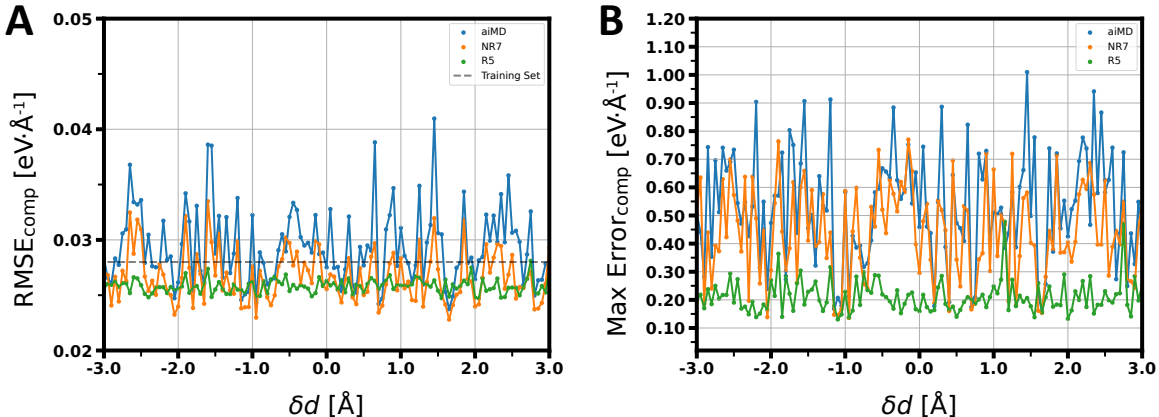

Figure S8: For three generation of NNPs, *aiMD* (blue), *NR7* (orange) and *R5* (green): (A) the component-wise force RMSE along  $\delta d$  on the test dataset. (B) the maximum component-wise force error along  $\delta d$  on the test dataset.

In Figure S9, we report the probability density of the component-wise force errors and the probability density of the magnitude per atom force errors on the training and test datasets for the last ( $R5$ ) reactive cycle. The RMSE on component-wise forces for training dataset is equal to  $0.028 \text{ eV} \cdot \text{\AA}^{-1}$  and for test dataset is equal to  $0.026 \text{ eV} \cdot \text{\AA}^{-1}$ , while the RMSE on the magnitude per atom force errors for training dataset is equal to  $0.048 \text{ eV} \cdot \text{\AA}^{-1}$  and for test dataset is equal to  $0.045 \text{ eV} \cdot \text{\AA}^{-1}$ .

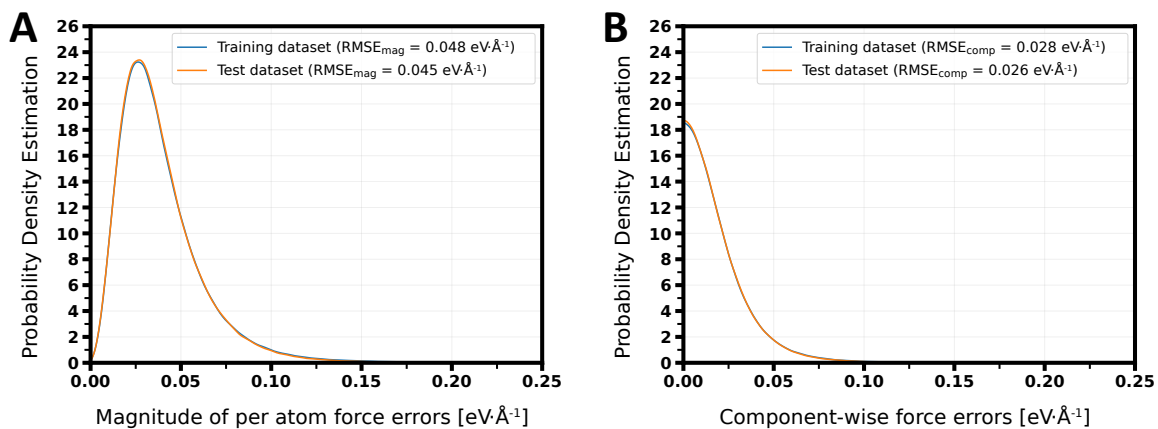

Figure S9: (A) Probability density of the magnitude of per-atom force errors on the training dataset and the test dataset. (B) Probability density of the component-wise force errors on the training dataset and the test dataset.

# Free energy profiles and CV for the $NR2$ and $NR3$ NNPs for the $S_N2$ reaction

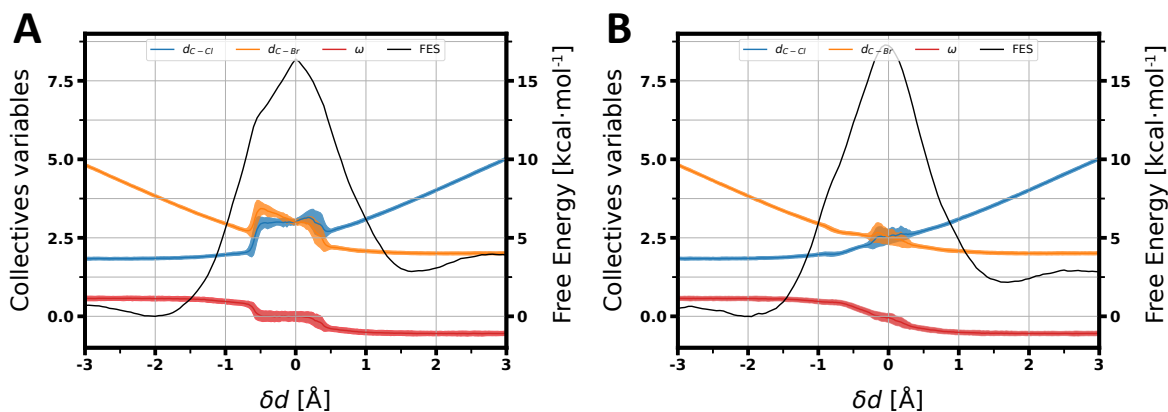

Figure S10: Free energy surface obtained from the Umbrella Sampling simulations (black) and the average value of the collective variables (as well as the 95% confidence interval in shaded color); (A) with the NNP trained on the  $NR2$  dataset. (B) with the NNP trained on the  $NR3$  dataset.

## Validation of the *R8* (production) NNP for the Diels-Alder reaction

In Figure S11, we report the probability density of the magnitude per atom force errors on the training and test datasets for the last (*R8*) reactive cycle. The RMSE on component-wise forces for training dataset is equal to  $0.070 \text{ eV} \cdot \text{\AA}^{-1}$  and for test dataset is equal to  $0.071 \text{ eV} \cdot \text{\AA}^{-1}$  (see Figure 7C), while the RMSE on the magnitude per atom force errors for training dataset is equal to  $0.122 \text{ eV} \cdot \text{\AA}^{-1}$  and for test dataset is equal to  $0.123 \text{ eV} \cdot \text{\AA}^{-1}$ .

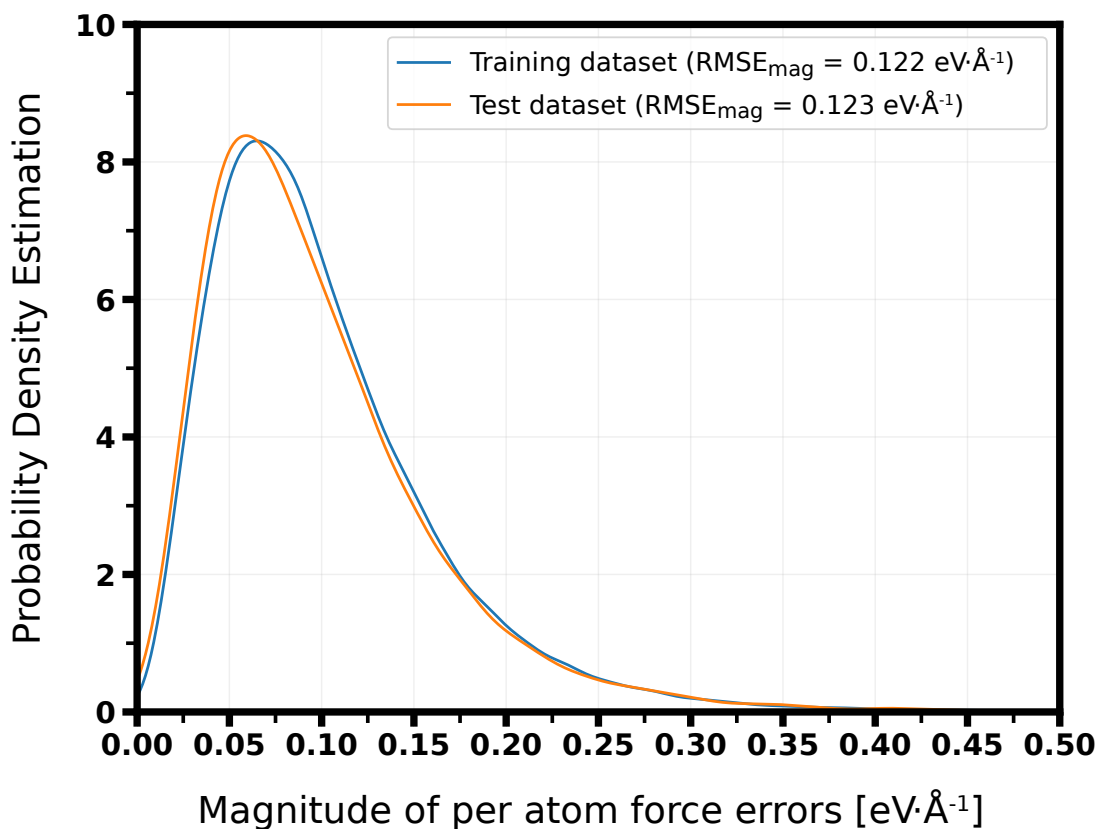

Figure S11: Probability density of the magnitude of per-atom force errors on the training dataset and the test dataset.

In Figure S12, we report the component-wise force RMSE and the maximum component-wise force error along  $\bar{d}$  on the test dataset.

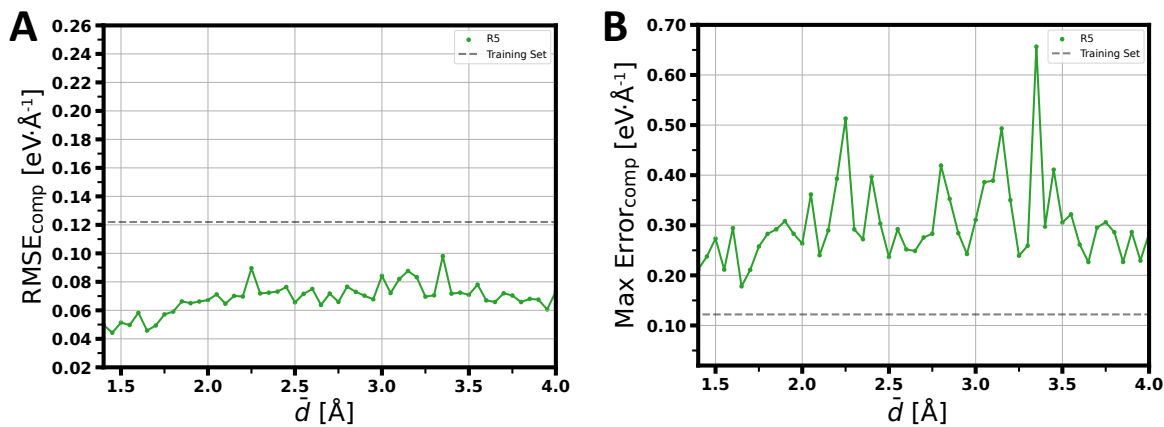

Figure S12: (A) the component-wise force RMSE along  $\delta d$  on the test dataset for the *R8* NNP. (B) the maximum component-wise force error along  $\delta d$  on the test dataset for the *R8* NNP.



Joint density distribution of the two main distances for the Diels-Alder reaction

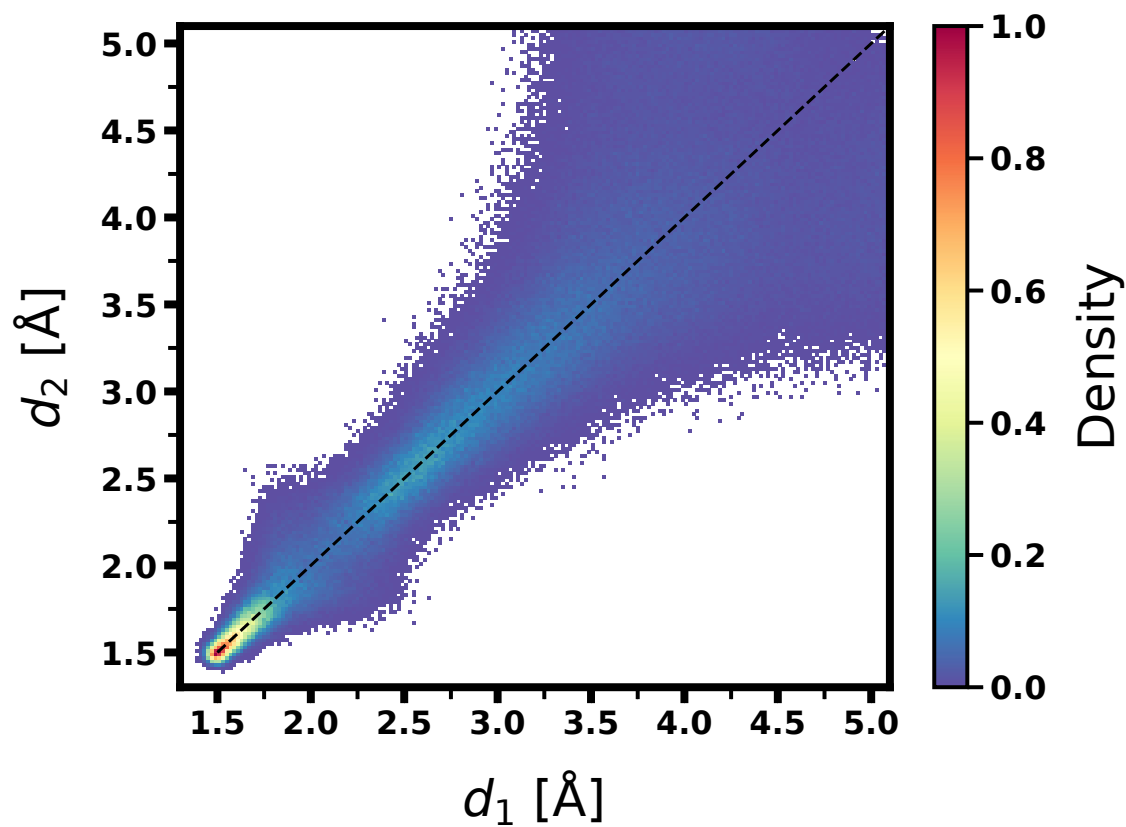

Figure S13: Joint density distribution of the distance  $d_1$  and the distance  $d_2$ , with the dotted line representing  $d_1 = d_2$ , in the Umbrella Sampling simulations.

Joint density distribution of the two main distances in each important training dataset for the  $S_N2$  reaction

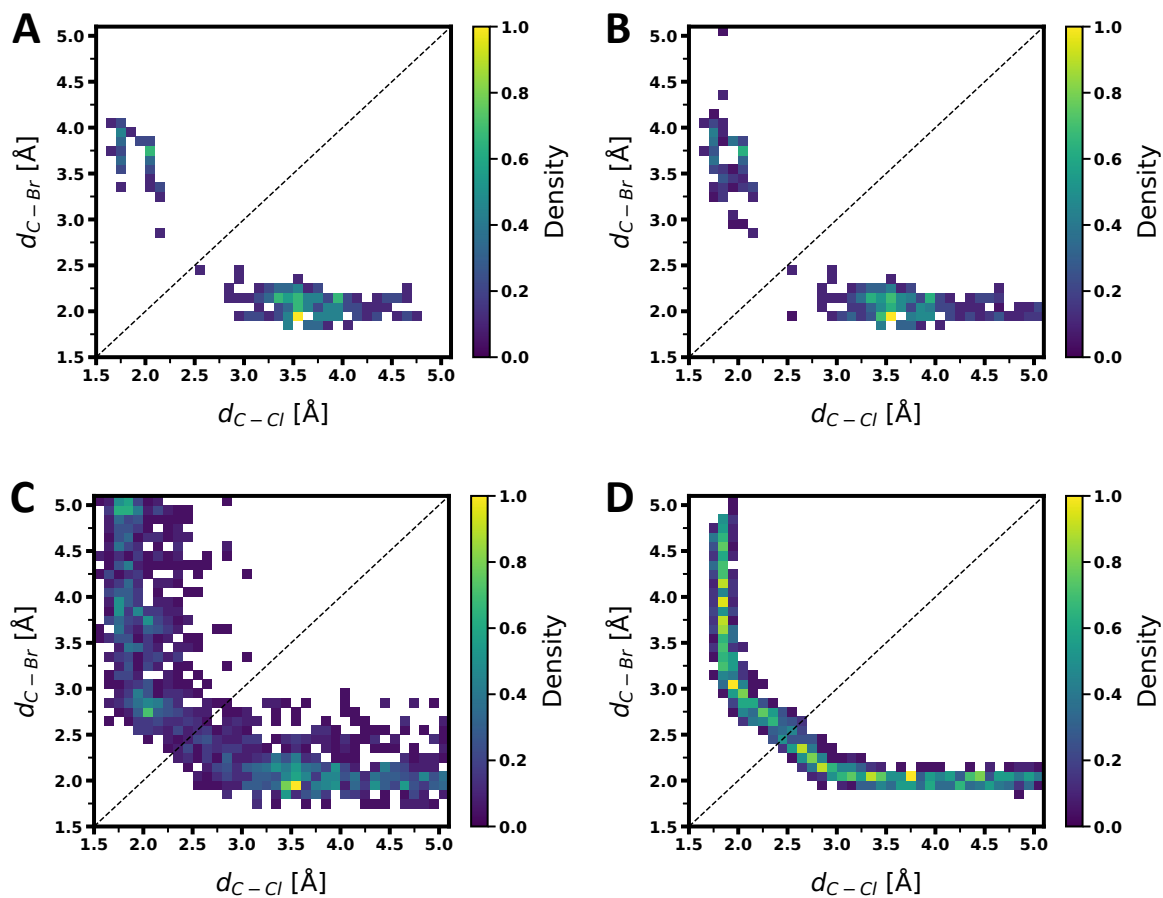

Figure S14: Joint density distribution of the distance  $d_{C-Cl}$  and the distance  $d_{C-Br}$ , with the dotted line representing  $\delta d = 0 \text{ \AA}$  of the structures; (A) in the  $aiMD$  dataset. (B) in the  $NR7$  dataset. (C) in the  $R5$  dataset. (D) in the test dataset.

OPES 1D free energy profile and CV from the  $R5$  NNP  
for the  $S_N2$  reaction

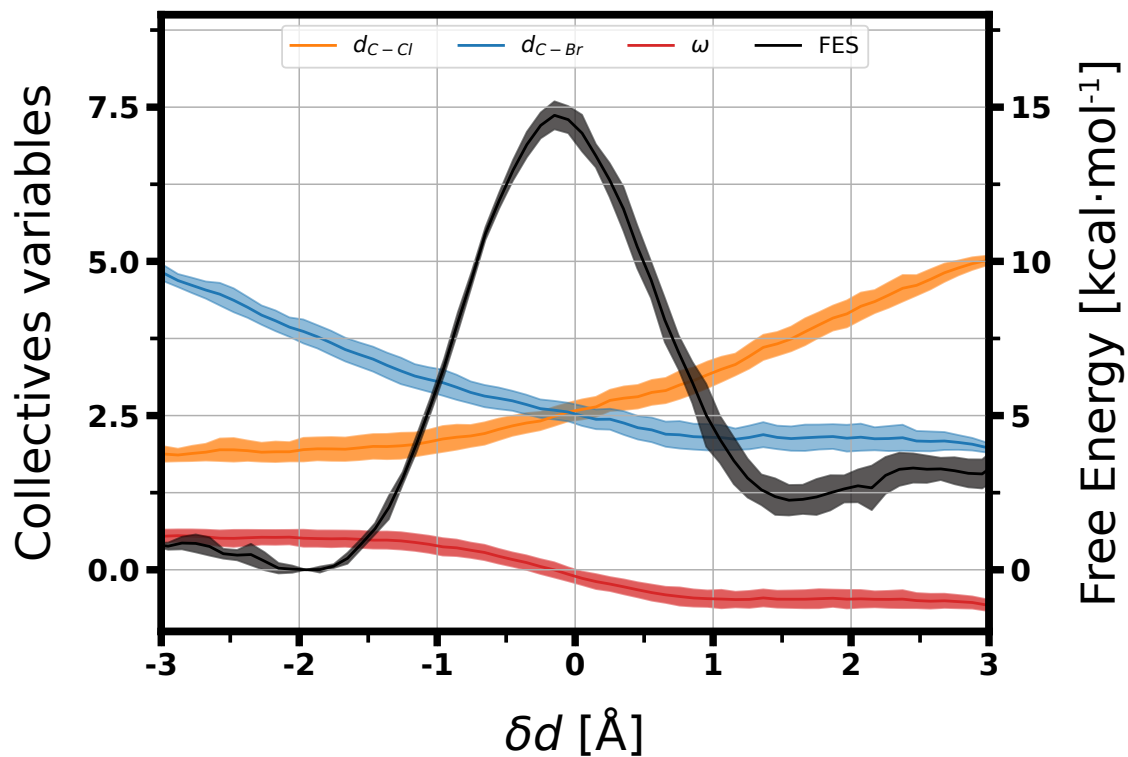

Figure S15: Free energy surface obtained from the OPES simulation (with the NNP trained on the  $R5$  dataset) (black) and the average value of the collective variables (as well as the 95% confidence interval in shaded color)

## References

- (1) Martínez, L.; Andrade, R.; Birgin, E. G.; Martínez, J. M. PACKMOL: A Package for Building Initial Configurations for Molecular Dynamics Simulations. *J. Comput. Chem.* **2009**, *30*, 2157–2164.
- (2) Wang, J.; Wolf, R. M.; Caldwell, J. W.; Kollman, P. A.; Case, D. A. Development and Testing of a General Amber Force Field. *J. Comput. Chem.* **2004**, *25*, 1157–1174.
- (3) Kühne, T. D. et al. CP2K: An Electronic Structure and Molecular Dynamics Software Package - Quickstep: Efficient and Accurate Electronic Structure Calculations. *J. Chem. Phys.* **2020**, *152*, 194103.
- (4) Becke, A. D. Density-Functional Exchange-Energy Approximation with Correct Asymptotic Behavior. *Phys. Rev. A* **1988**, *38*, 3098–3100.
- (5) Lee, C.; Yang, W.; Parr, R. G. Development of the Colle-Salvetti Correlation-Energy Formula into a Functional of the Electron Density. *Phys. Rev. B* **1988**, *37*, 785–789.
- (6) Grimme, S.; Antony, J.; Ehrlich, S.; Krieg, H. A Consistent and Accurate *Ab Initio* Parametrization of Density Functional Dispersion Correction (DFT-D) for the 94 Elements H-Pu. *J. Chem. Phys.* **2010**, *132*, 154104.
- (7) Weigend, F.; Ahlrichs, R. Balanced Basis Sets of Split Valence, Triple Zeta Valence and Quadruple Zeta Valence Quality for H to Rn: Design and Assessment of Accuracy. *Phys. Chem. Chem. Phys.* **2005**, *7*, 3297.
- (8) VandeVondele, J.; Hutter, J. Gaussian Basis Sets for Accurate Calculations on Molecular Systems in Gas and Condensed Phases. *J. Chem. Phys.* **2007**, *127*, 114105.
- (9) Goedecker, S.; Teter, M.; Hutter, J. Separable Dual-Space Gaussian Pseudopotentials. *Phys. Rev. B* **1996**, *54*, 1703–1710.

- (10) Hartwigsen, C.; Goedecker, S.; Hutter, J. Relativistic Separable Dual-Space Gaussian Pseudopotentials from H to Rn. *Phys. Rev. B* **1998**, *58*, 3641–3662.
- (11) Krack, M. Pseudopotentials for H to Kr Optimized for Gradient-Corrected Exchange-Correlation Functionals. *Theor. Chem. Acc.* **2005**, *114*, 145–152.
- (12) Bussi, G.; Donadio, D.; Parrinello, M. Canonical Sampling through Velocity Rescaling. *J. Chem. Phys.* **2007**, *126*, 14101.
